# Supplementary material
Source: PubMed Central journal article supplement (PMC3984126)
Supplement: supp_deu032_deu032_supp_fig1.pdf [file supp_deu032_deu032_supp_fig1.pdf]

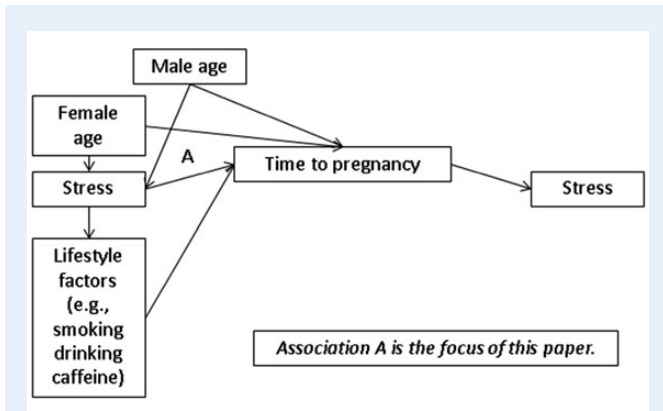

**Supplementary Figure S1** Conceptual diagram outlining the hypothesized associations between stress and to pregnancy.
