# Supplementary material
Source: PubMed Central journal article supplement (PMC3984126)
Supplement: supp_deu032_deu032_supp_fig2.pdf [file supp_deu032_deu032_supp_fig2.pdf]

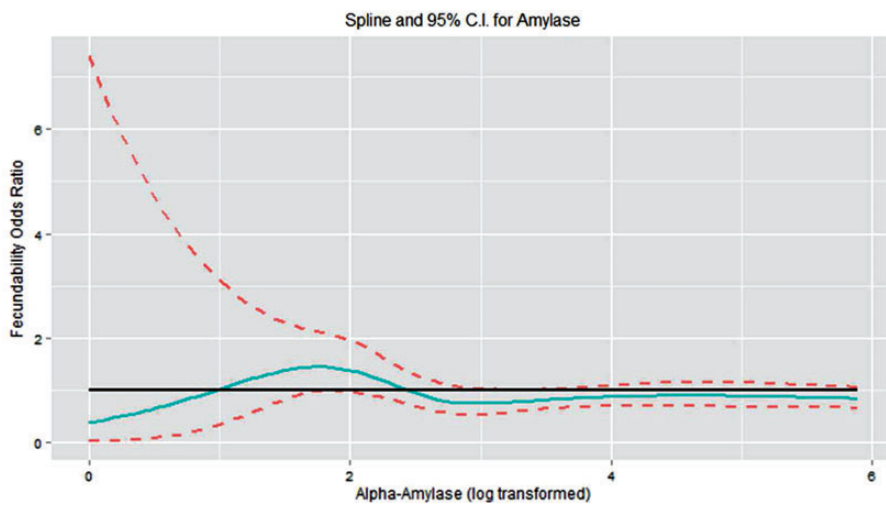

**Supplementary Figure S2** Fecundability odds ratios by adjusted\* log alpha-amylase level, spline with five knots. \*Adjusted for age of female, difference in age between male and female, income of female (dichotomized), race of female (dichotomized), female's cigarette use, female's caffeine use, and female's alcohol use.
